# Supplementary material for: Water tuned nano/micro-structures in a redox-responsive supramolecular gel
Source: Royal Society of Chemistry journal article supplement (doi:10.1039/c4ra12247j), 2014-01-01
Supplement: c4ra12247j1.pdf [file c4ra12247j1.pdf]

## Supporting Information

### Water tuned nano/micro-structures in redox-responsive supramolecular gel

Yuxia Gao,<sup>a</sup> Jinrong Lu,<sup>a</sup> Jindan Wu,<sup>a</sup> Jun Hu\*<sup>b</sup> and Yong Ju\*<sup>a</sup>

*<sup>a</sup> Key Laboratory of Bioorganic Phosphorus Chemistry & Chemical Biology, Ministry of Education, Department of Chemistry, Tsinghua University, Beijing 100084, China. E-mail:*

*juyong@tsinghua.edu.cn;*

*<sup>b</sup> State Key Lab of Polymer Physics and Chemistry, Changchun Institute of Applied Chemistry, Chinese Academy of Sciences, Changchun 130022, China. E-mail: jhu@ciac.ac.cn.*

### Content

|                                                                          |    |
|--------------------------------------------------------------------------|----|
| 1. Instruments                                                           | 2  |
| 2. Table S1                                                              | 2  |
| 3. Figure S1 to Figure S5                                                | 3  |
| 4. Synthesis and structure characterization of gelator <b>1</b>          | 5  |
| 5. Synthesis and structure characterization of control molecule <b>5</b> | 14 |
| 6. Reference                                                             | 18 |

## 1. Instruments

$^1\text{H}$  and  $^{13}\text{C}$  NMR spectra were recorded on a JOEL JNM-ECA 300 or 400 spectrometer; Electrospray ionization mass spectrometry (ESI-MS) was obtained on Bruker ESQUIRE-LC spectrometer; High-resolution mass spectrometry (HRMS) was measured using quadrupole time-of-flight (Q-ToF) as mass analyzer in positive mode; Scanning electron microscopy (SEM) was performed on LEO-1530 instrument operating at accelerating voltages of 10 kV; Samples were placed on the glass and coated with gold before the measurement; Atomic Force Microscope (AFM) was recorded on a SPM-9600 (Shimadzu) in tapping mode; Samples were placed on the mica plate and dried in air before test; Transmission Electron Microscope (TEM) was acquired on Hitachi H-7650B instrument; The samples were prepared by drop-casting the hot solution of gel on the copper grid, and then dried in air; IR spectra were measured as KBr pellets with a Nicolet 360 FT-IR spectrometer; UV-Vis and fluorescence spectra were obtained on TU-1901 and Perkin Elmer LS55 Luminescence spectrometer, respectively; Circular dichroism (CD) spectra were carried on a Pistar  $\pi$ -180 instrument (Applied Photophysics Ltd) with a 150 w xenon lamp as the light source; X-ray diffraction (XRD) was performed on a Rigaku D/max 2500v X-ray diffractometer with CuK $\alpha$  radiation ( $\lambda=1.5406 \text{ \AA}$ ), operating at 45 kV, 100 mA; Rheological measurements were characterized with a TA-AR2000ex rheometer with a 8 mm diameter parallel plate geometry at 25 °C.

## 2.

| entry | solvent              | state <sup>a</sup> |
|-------|----------------------|--------------------|
| 1     | CHCl <sub>3</sub>    | S                  |
| 2     | CH <sub>3</sub> OH   | I                  |
| 3     | CH <sub>3</sub> CN   | P                  |
| 4     | acetone              | P                  |
| 5     | isopropanol          | I                  |
| 6     | dioxane              | P                  |
| 7     | toluene              | S                  |
| 8     | o-dichlorobenzene    | S                  |
| 9     | THF                  | S                  |
| 10    | DMSO                 | PG                 |
| 11    | DMF                  | S                  |
| 12    | DMF/H <sub>2</sub> O | G                  |

<sup>a</sup> S = soluble; I= insoluble; P =precipitate; PG = partical gel; G = stable gel.

**Table S1** The gelation behavior of **1** in various organic solvents.

3.

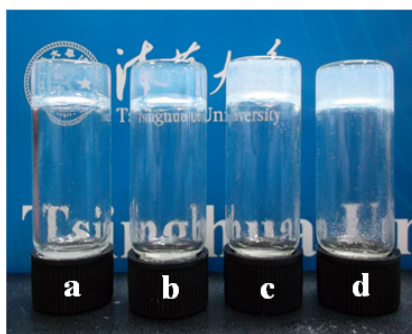

**Figure S1** Optical images of gels formed by **1** (10 mg/mL) in different DMF/H<sub>2</sub>O (v/v) ratio: (a) 20:1; (b) 10:1; (c) 6:1; (d) 5:1.

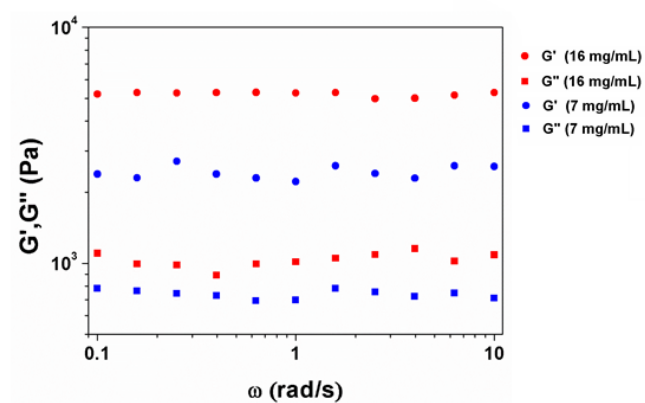

**Figure S2** Evolution of  $G'$  and  $G''$  as functions of the angle frequency of **1** in DMF/H<sub>2</sub>O (10:1, v/v) under different concentration

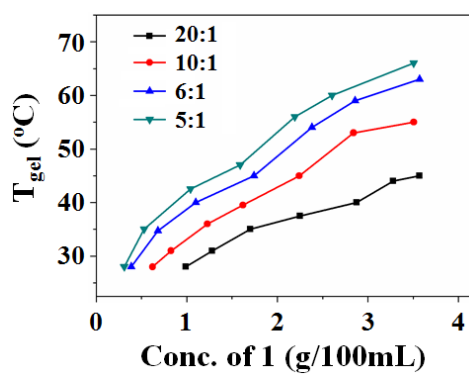

**Figure S3** Plots of  $T_{gel}$  against the concentration of **1** in different DMF/H<sub>2</sub>O (v/v) ratio.

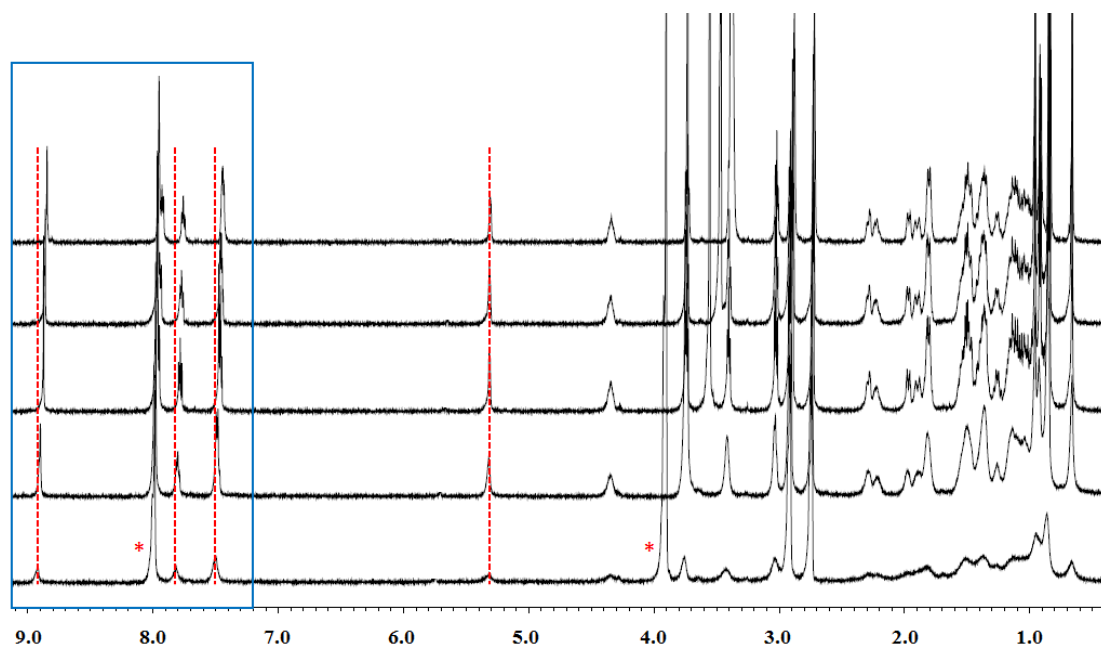

**Figure S4** Temperature-dependent  $^1\text{H}$  NMR (600MHz) of **1** (10 mg/mL) in DMF- $d_7$ /D $_2$ O (10:1, v/v), \* indicates the signal of solvents.

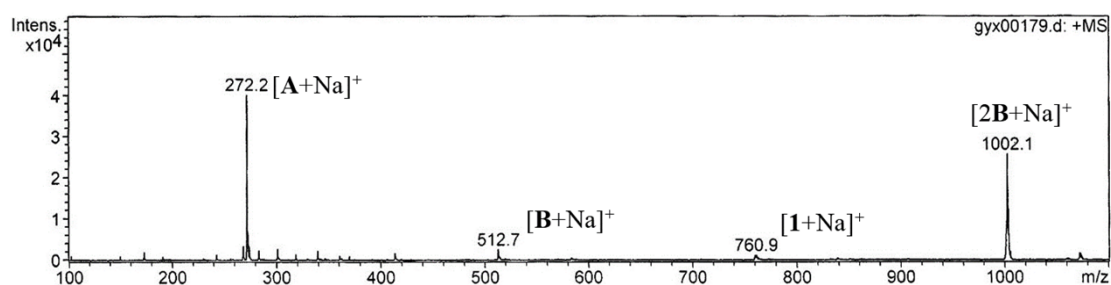

**Figure S5** ESI-MS spectrum of the gel from **1** in DMF/H $_2$ O (10:1, v/v) after DTT reduction. The disulfide bond of compound **1** was cleaved by DTT to form two sulfhydryl compounds A and B. Structures are provided below:

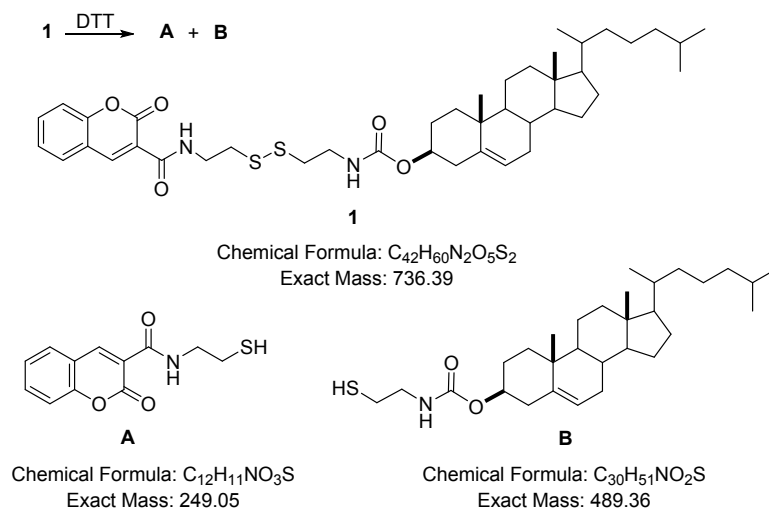

## 4. Synthesis and structure characterization of gelator 1

### Compound 2

The solution of Boc<sub>2</sub>O (2.18 g, 10 mmol) in CH<sub>3</sub>OH (10 mL) was added dropwise to a solution of triethylamine (4.5 mL, 31 mmol) and cystamine dihydrochloride (2.25 g, 10 mmol) in CH<sub>3</sub>OH (25 mL) in 20 minutes.<sup>1</sup> The reaction mixture was stirred at room temperature for 5 h, and then the solvent was evaporated. The residue was dissolved in 25 mL KH<sub>2</sub>PO<sub>4</sub> (1 mol/L) to make pH 4.27, then washed by ether (3×30 mL). The water phase was regulated with NaOH aqueous (1 mol/L) until the pH reached 9, and then extracted with ethyl acetate (3×30 mL). The organic layer was combined and dried over anhydrous sodium sulfate. After the filtration and evaporation, a yellow oily liquid was obtained (951mg, yield 38 %). ESI-MS (+): 253.2 [M+H]<sup>+</sup>; HRMS (ESI): m/z [M+H]<sup>+</sup> calcd. for C<sub>9</sub>H<sub>20</sub>N<sub>2</sub>O<sub>2</sub>S<sub>2</sub>: 253.1039, found 253.1036 [M+H]<sup>+</sup>; <sup>1</sup>H NMR (400 MHz, CDCl<sub>3</sub>): 5.42 (broad, H, NH<sub>2</sub>Boc), 3.27 (d, 2H, -CH<sub>2</sub>-NH<sub>2</sub>Boc, *J* = 5.5 Hz), 2.86 (t, 2H, NH<sub>2</sub>-CH<sub>2</sub>, *J* = 6.4 Hz), 2.64, 2.63, 2.61 (t, 4H, 2×S-CH<sub>2</sub>, *J* = 6.4 Hz), 1.95 (broad, 2H, -CH<sub>2</sub>-NH<sub>2</sub>), 1.27 (s, 9H, 3×-CH<sub>3</sub>); <sup>13</sup>C NMR (100 MHz, CDCl<sub>3</sub>): 155.87 (O=C-NH), 77.69 (-C(CH<sub>3</sub>)<sub>3</sub>), 41.91 (NH<sub>2</sub>Boc-CH<sub>2</sub>), 40.34 (NH<sub>2</sub>-CH<sub>2</sub>-CH<sub>2</sub>-S-), 39.35 (NH<sub>2</sub>Boc-CH<sub>2</sub>-CH<sub>2</sub>), 38.29 (NH<sub>2</sub>-CH<sub>2</sub>), 28.40 (-CH<sub>3</sub>).

#### (1) ESI-MS (+) spectrum of compound 2

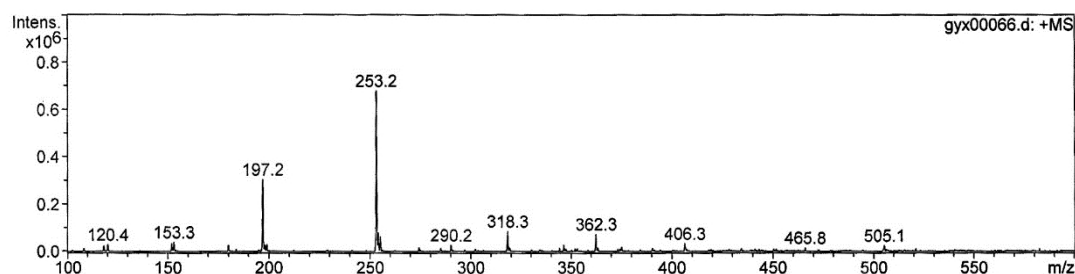

#### (2) HRMS (ESI) spectrum of compound 2

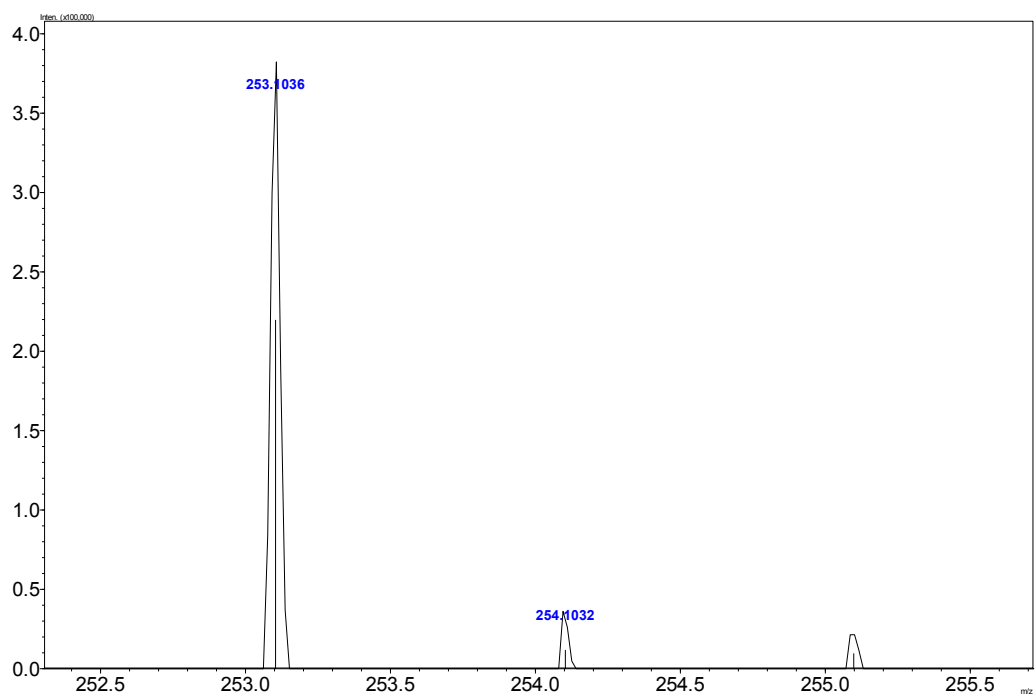

(3)  $^1\text{H}$  NMR spectrum of compound **2** (400 MHz,  $\text{CDCl}_3$ )

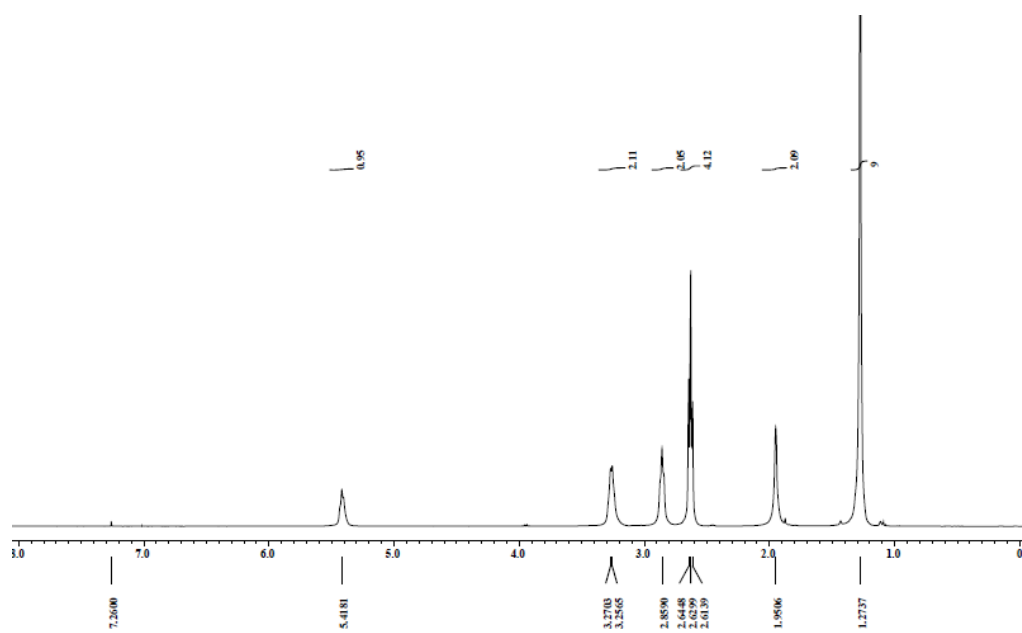

(4)  $^{13}\text{C}$  NMR spectrum of compound **2** (100 MHz,  $\text{CDCl}_3$ )

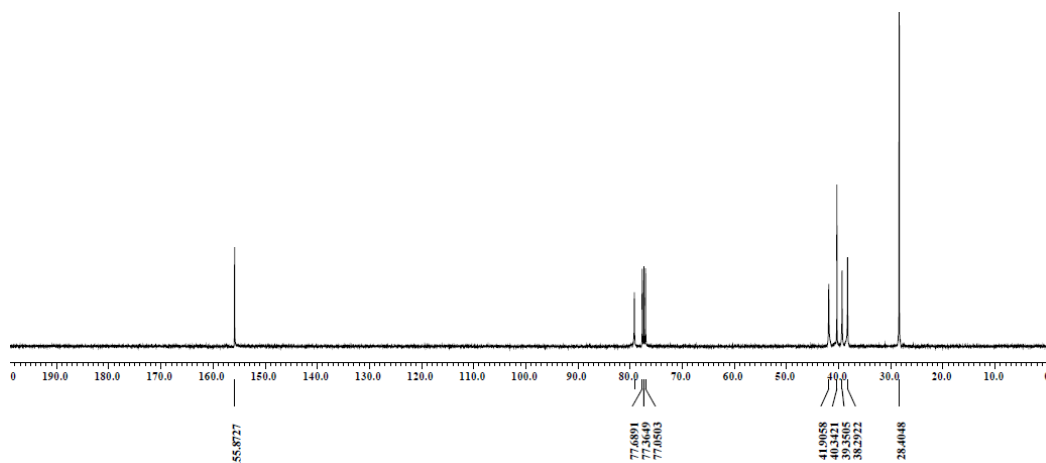

### Compound 3

Thionyl chloride (1 mL, 13.8 mmol) was added to a solution of coumarin-3-carboxylic acid (285 mg, 1.50 mmol) in  $\text{CH}_2\text{Cl}_2$ , then the mixture refluxed at 40 °C for 8 h. Acyl chloride (light yellow solid) was obtained after evaporating the solvent and unreacted thionyl chloride. Triethylamine (0.5 mL, 3.4 mmol) was added to a solution of **2** (378 mg, 1.50 mmol) in dry  $\text{CH}_2\text{Cl}_2$ , then the dilution solution of acyl chloride in 10 mL  $\text{CH}_2\text{Cl}_2$  was added dropwise at 0°C. The mixture was stirred at room temperature for 12 h, then washed with water and brine water, the organic layer was dried over anhydrous sodium sulfate. After filtration and evaporation, the crude product was purified by chromatography ( $\text{CH}_2\text{Cl}_2$  :  $\text{CH}_3\text{OH}$ =100:1) to give compound **3** as a white solid (550 mg, 87 %). ESI-MS (+): 463.2  $[\text{M}+\text{K}]^+$ ; HRMS (ESI):  $m/z$   $[\text{M}+\text{H}]^+$  calcd. for  $\text{C}_{19}\text{H}_{24}\text{N}_2\text{O}_5\text{S}_2$ : 425.1199, found 425.1199  $[\text{M}+\text{H}]^+$ ;  $^1\text{H}$  NMR (300 MHz,  $\text{CDCl}_3$ ): 9.06 (broad, H,  $\text{NH}(\text{Boc})$ ), 8.87 (s, H, Coumarin-4- $\text{CH}$ ), 7.65, 7.38 (t, t, 4H, Ar-H), 5.13 (broad, H, Coumarin-3-CO-NH), 3.75 (q, 2H, Coumarin-3-CO-NH- $\text{CH}_2$ ,  $J = 6.5$  Hz), 3.42 (q, 2H,  $\text{NH}(\text{Boc})$ - $\text{CH}_2$ ,  $J = 6.2$  Hz), 2.90 (t, 2H, Coumarin-3-CO-NH- $\text{CH}_2$ - $\text{CH}_2$ -S-,  $J = 6.5$  Hz), 2.80 (t, 2H, -S- $\text{CH}_2$ - $\text{CH}_2$ - $\text{NH}(\text{Boc})$ ,  $J = 6.2$  Hz), 1.40 (s, 9H,  $3 \times$ - $\text{CH}_3$ );  $^{13}\text{C}$  NMR (75 MHz,  $\text{CDCl}_3$ ): 161.83 (Coumarin-2- $\text{C}=\text{O}$ ), 161.43 (Coumarin-3- $\text{CO}$ -NH-), 155.88 ( $\text{C}(\text{CH}_3)_3$ -O- $\text{C}=\text{O}$ ), 154.51, 148.57, 134.26, 129.92, 125.42, 118.33 (Ar- $\text{C}$ -), 118.66 (Coumarin-4- $\text{CH}$ ), 116.73 (Coumarin-3- $\text{C}$ ), 79.46 ( $\text{C}(\text{CH}_3)_3$ ), 39.38, 38.89, 38.72, 37.44 ( $4 \times$ - $\text{CH}_2$ ), 28.48 (- $\text{CH}_3$ ).

#### (1) ESI-MS (+) spectrum of compound 3

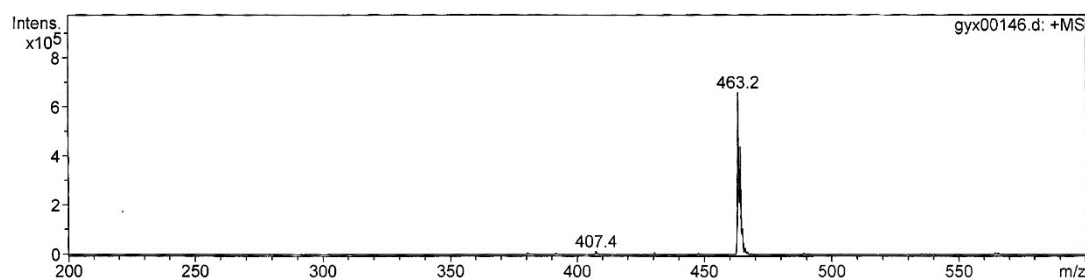

(2) HRMS (ESI) spectrum of compound **3**

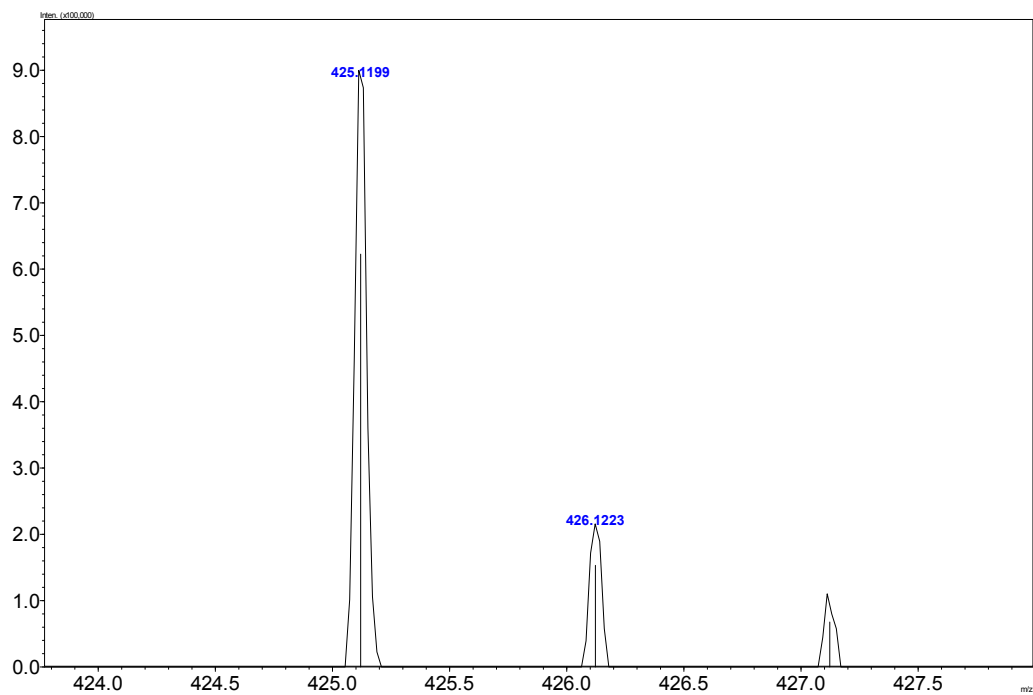

(3)  $^1\text{H}$  NMR spectrum of compound **3** (300 MHz,  $\text{CDCl}_3$ )

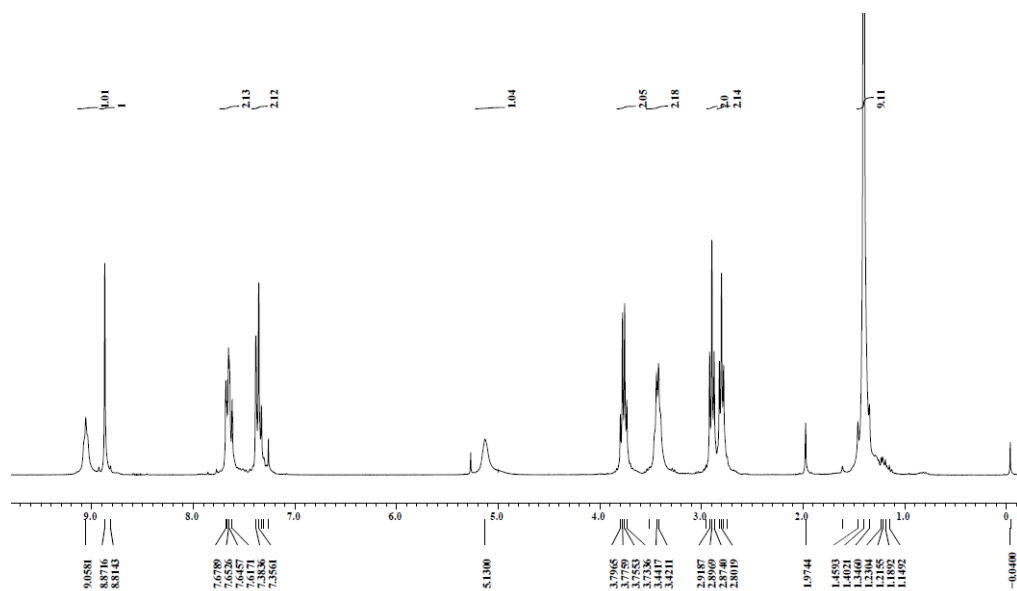



(4)  $^{13}\text{C}$  NMR spectrum of compound **3** (75 MHz,  $\text{CDCl}_3$ )

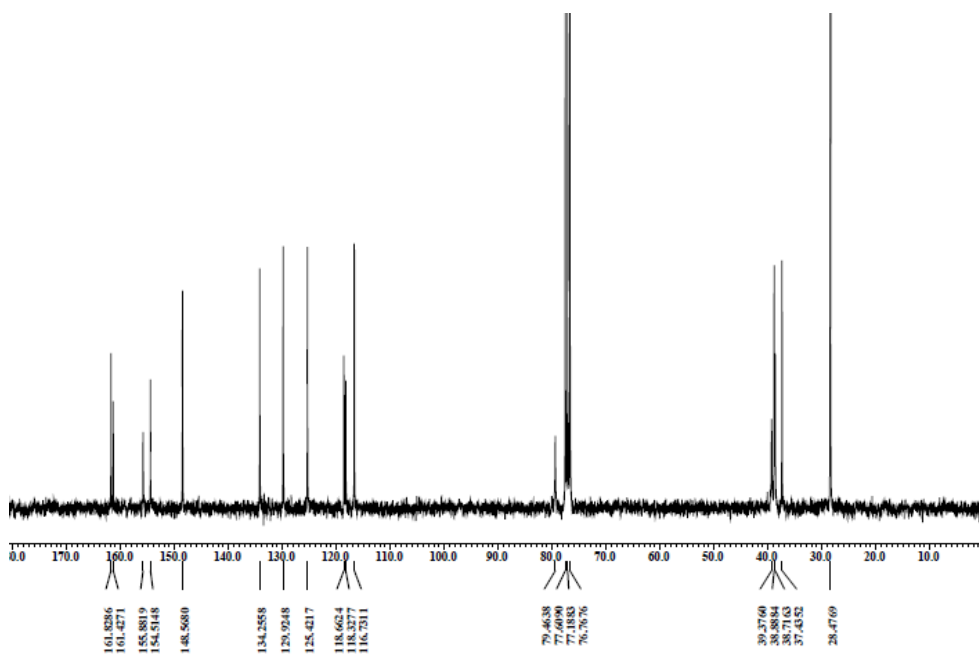

#### Compound 4

Trifluoroacetic acid (TFA) was added dropwise to a solution of **3** (840 mg, 1.98 mmol) in 10 mL  $\text{CH}_2\text{Cl}_2$  at  $0^\circ\text{C}$ , the mixture was stirred at room temperature for 10 h. Evaporation was used to remove the unreacted TFA and solvent. The residue was dissolved in  $\text{CH}_2\text{Cl}_2$  and washed with  $\text{NaHCO}_3$  for twice, then washed with water and brine water. The organic layer was dried over the anhydrous sodium sulfate and evaporated to give the crude product. The chromatography ( $\text{CH}_2\text{Cl}_2$ :  $\text{CH}_3\text{OH}$ =100:1 to 10:1) was employed to purify the crude product and compound **4** was gained as a white solid (580 mg, 90%). ESI-MS (+): 325.4  $[\text{M}+\text{H}]^+$ ; HRMS (ESI):  $m/z$   $[\text{M}+\text{H}]^+$  calcd. for  $\text{C}_{14}\text{H}_{16}\text{N}_2\text{O}_3\text{S}_2$ : 325.0675, found 325.0679  $[\text{M}+\text{H}]^+$ ;  $^1\text{H}$  NMR (300 MHz,  $\text{CDCl}_3$ ): 9.00 (broad, H,  $\text{NH}-\text{C}=\text{O}$ ), 8.82 (s, H, Coumarin-4- $\text{CH}$ ), 7.62, 7.33 (t, t, 4H, Ar-H), 3.75 (q, 2H, Coumarin-3- $\text{CO}-\text{NH}-\text{CH}_2$ ,  $J = 6.5$  Hz), 2.95 (q, 2H,  $\text{NH}_2-\text{CH}_2$ ,  $J = 6.2$  Hz), 2.85 (q, 2H, Coumarin-3- $\text{CO}-\text{NH}-\text{CH}_2-\text{CH}_2-\text{S}$ ,  $J = 6.5$  Hz), 2.75 (q, 2H,  $-\text{S}-\text{CH}_2-\text{CH}_2-\text{NH}_2$ ,  $J = 6.2$  Hz), 1.36 (broad, 2H,  $\text{NH}_2$ );  $^{13}\text{C}$  NMR (75 MHz,  $\text{CDCl}_3$ ): 161.70 (Coumarin-2- $\text{C}=\text{O}$ ), 161.36 (Coumarin-3- $\text{CO}-\text{NH}$ ), 154.46, 148.47, 134.21, 129.90, 118.61, 118.30 (Ar- $\text{C}$ ), 125.37 (Coumarin-4- $\text{CH}$ ), 116.66 (Coumarin-3- $\text{C}$ ), 42.71, 40.73, 38.87, 37.62 ( $4\times-\text{CH}_2$ ).

(1) ESI-MS (+) spectrum of compound 4

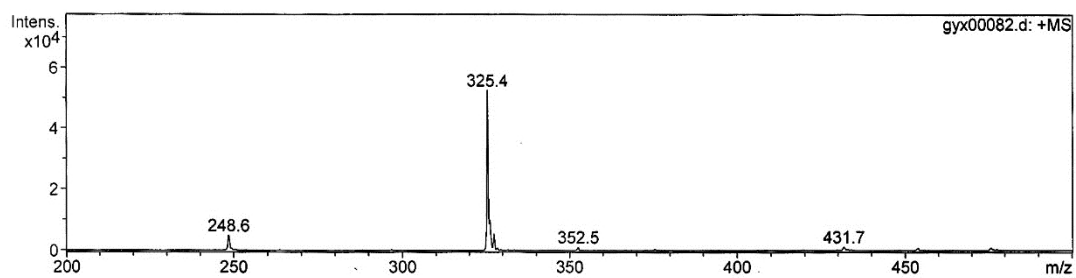

(2) HRMS (ESI) spectrum of compound 4

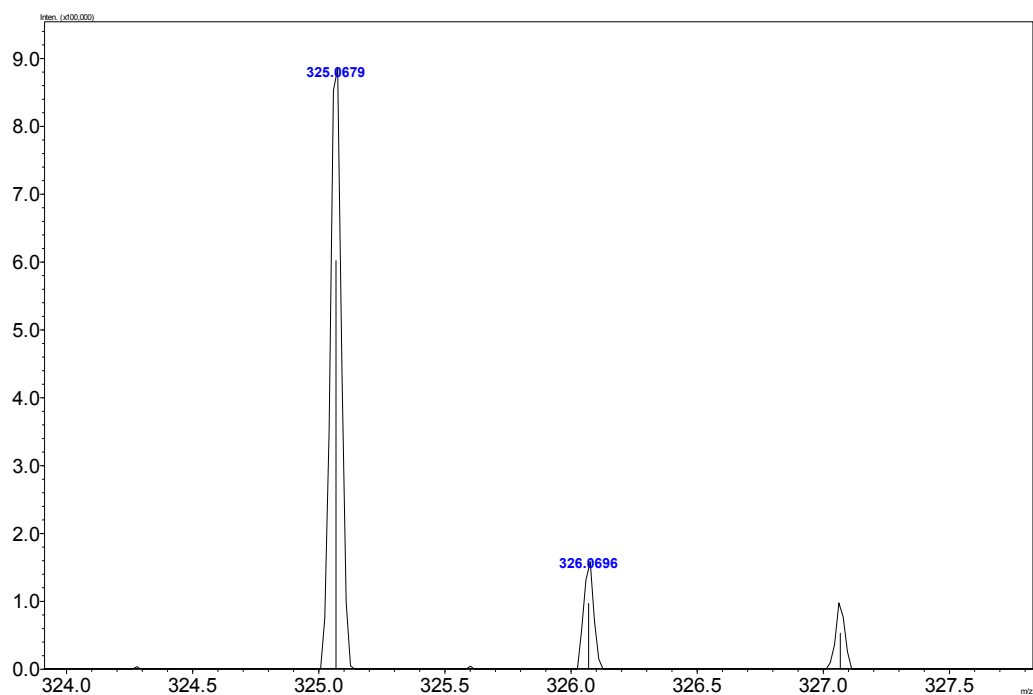

(3) <sup>1</sup>H NMR spectrum of compound 4 (300 MHz, CDCl<sub>3</sub>)

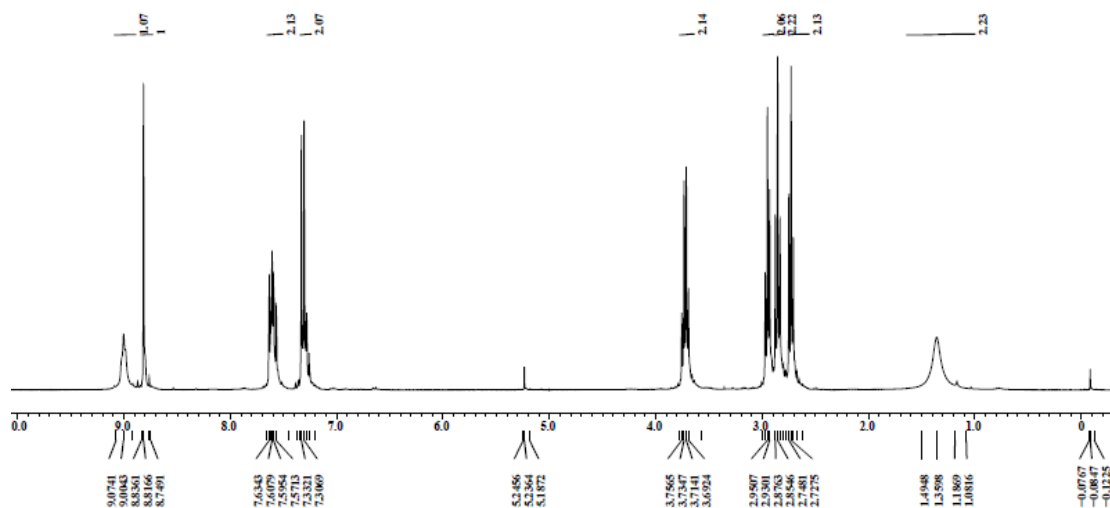

(4)  $^{13}\text{C}$  NMR spectrum of compound **4** (75 MHz,  $\text{CDCl}_3$ )

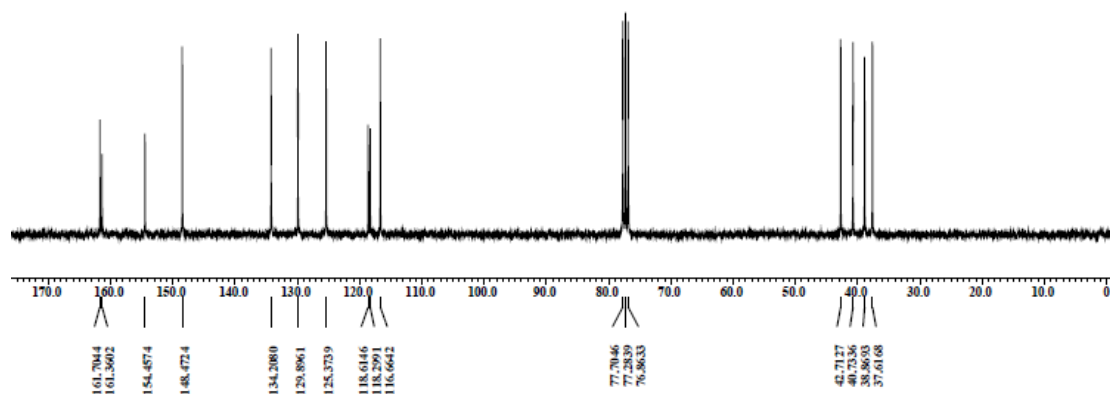

### Compound **1**

To a solution of compound **4** (564mg, 1.74mmol) and triethylamine (0.5 mL, 3.4 mmol) in 15 mL  $\text{CH}_2\text{Cl}_2$ , cholesteryl chloroformate (780mg, 1.74mmol) was added at 0 °C, then the mixture was stirred at room temperature for 12 h. The reaction mixture was washed with water (30 mL $\times$ 2) and brine water (30 mL), organic layer was dried and evaporated to give the crude product. The target compound **1** (657 mg, 53%) was obtained by further silica column chromatography ( $\text{CH}_2\text{Cl}_2$ :  $\text{CH}_3\text{OH}$ =150:1) as a white solid. m.p. 153-154 °C; ESI-MS (+):760.0  $[\text{M}+\text{Na}]^+$ ; HRMS (ESI):  $m/z$   $[\text{M}+\text{H}]^+$  calcd. for  $\text{C}_{42}\text{H}_{60}\text{N}_2\text{O}_5\text{S}_2$ : 737.4016, found 737.4019  $[\text{M}+\text{H}]^+$ ;  $^1\text{H}$  NMR (300 MHz,  $\text{CDCl}_3$ ): 9.06 (broad, H,  $\text{NH}$ ), 8.87 (s, H, Coumarin-4- $\text{CH}$ ), 7.65, 7.38 (t, t, 4H, Ar-H), 5.30 (broad, H,  $\text{NH}$ ), 5.21 (s, H, Cholesterol-6- $\text{CH}$ ), 4.45 (m, H, Cholesterol-3- $\text{CH}$ ), 3.78 (q, 2H, Coumarin-3-CO-NH- $\text{CH}_2$ ,  $J = 6.5$  Hz), 3.49 (q, 2H,  $\text{CH}_2$ -NH-COO,  $J = 6.2$  Hz), 2.90 (q, 2H, Coumarin-3-CO-NH  $\text{CH}_2$ - $\text{CH}_2$ -S-,  $J = 6.5$  Hz), 2.83 (q, 2H, -S- $\text{CH}_2$ - $\text{CH}_2$ -NH-COO,  $J = 6.2$  Hz), 0.94, 0.84, 0.82, 0.63 (4 $\times$ s, 4 $\times$ 3H, - $\text{CH}_3$ );  $^{13}\text{C}$  NMR (75 MHz,  $\text{CDCl}_3$ ): 161.82 (Coumarin-2- $\text{C}=\text{O}$ ), 161.40 (Coumarin-3- $\text{CO}$ -NH-), 156.15 (NH- $\text{COO}$ ), 154.53, 148.55, 134.24, 129.92, 118.68, 118.37 (Ar- $\text{C}$ -), 139.85 (Cholesterol-5- $\text{C}$ ), 125.40 (Cholesterol-6- $\text{CH}$ ), 122.52 (Coumarin-4- $\text{CH}$ ), 116.73 (Coumarin-3- $\text{C}$ ), 74.46 (Cholesterol-3- $\text{CH}$ ), 56.75, 56.21, 53.54, 50.06, 42.37, 39.81, 39.58, 38.93, 38.63, 37.48, 36.59, 36.26, 35.86, 31.92, 28.30, 28.24, 28.07, 24.35, 23.91, 22.91, 22.65, 21.11, 19.38, 18.80, 11.94.

(1) ESI-MS (+) spectrum of compound **1**

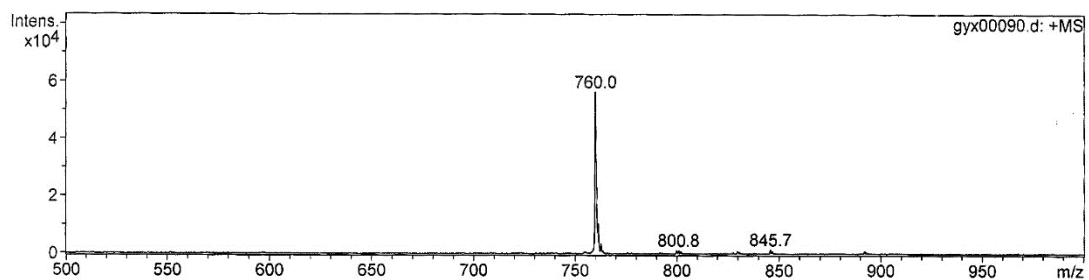

(2) HRMS (ESI) spectrum of compound **1**

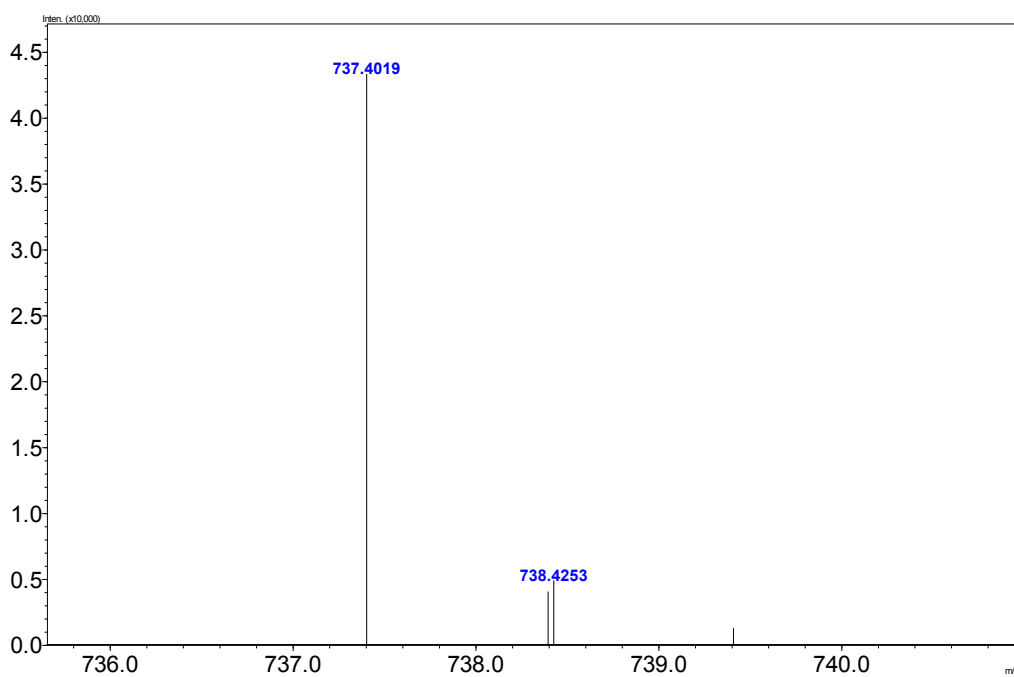

(3) <sup>1</sup>H NMR spectrum of compound **1** (300 MHz, CDCl<sub>3</sub>)

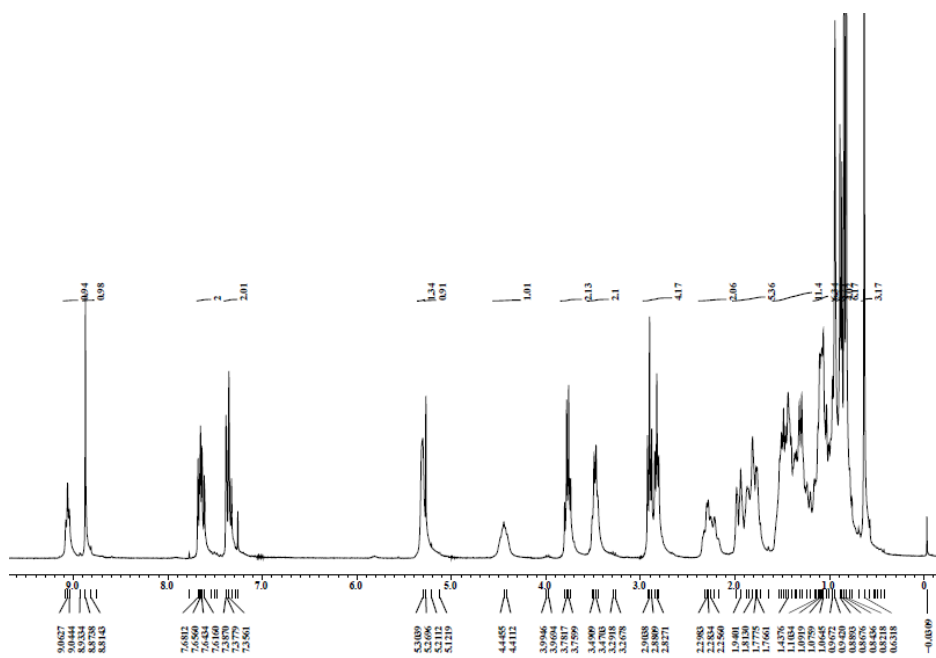

(4)  $^{13}\text{C}$  NMR spectrum of compound **1** (75 MHz,  $\text{CDCl}_3$ )

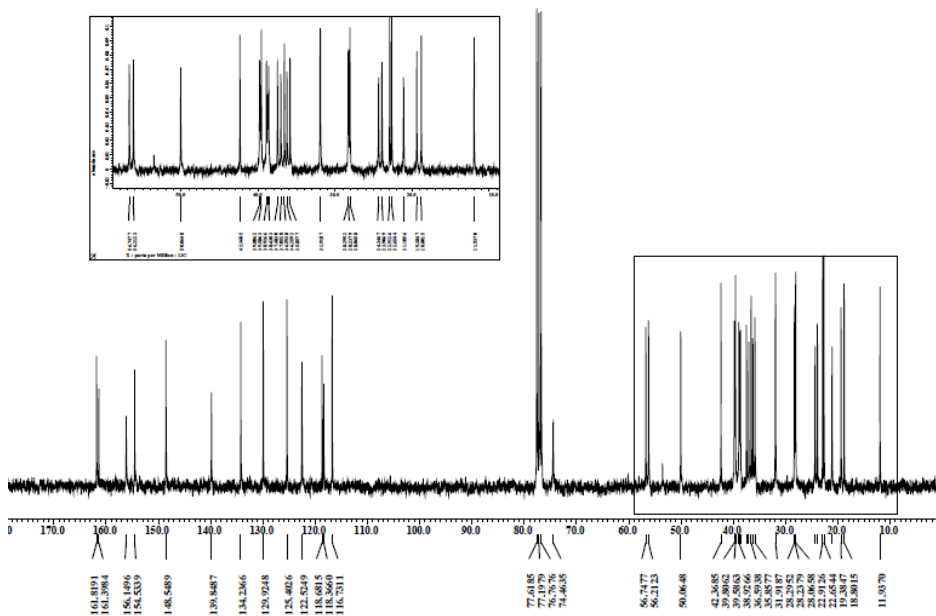

## 5. Synthesis and structure characterization of the control molecule 5

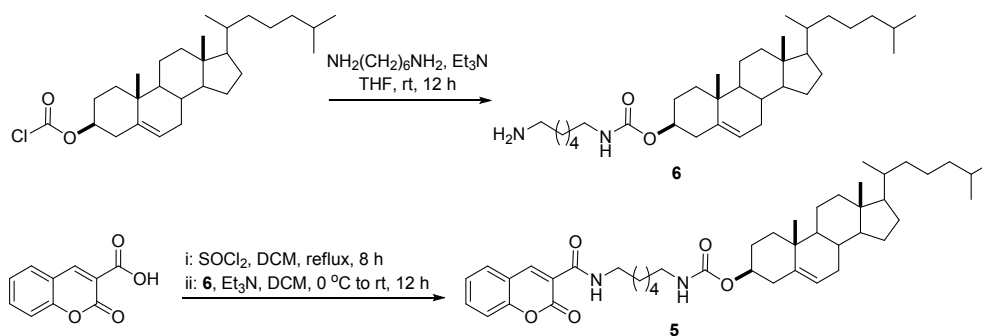

**Scheme. S1** The synthetic route of compound 5

### Compound 6

1,6-hexanediamine (4.68 mL, 35.6 mmol) and triethylamine (0.25 mL, 1.7 mmol) were dissolved in dry THF (20 mL). To the solution, 10 mL THF solution of cholesteryl chloroformate (800 mg, 1.78 mmol) was added dropwise at 0 °C (ice bath), then the mixture was stirred at room temperature for 12 h. The reaction mixture was filtered and the filtrate was evaporated. Then the residue was dissolved in  $\text{CH}_2\text{Cl}_2$  and washed with water (30 mL  $\times$  2) and brine water (30 mL). The organic layer was separated and dried by anhydrous sodium sulfate, finally evaporated to dryness. The crude product was further purified by chromatography ( $\text{CH}_2\text{Cl}_2$  :  $\text{CH}_3\text{OH}$  = 50:1) to give compound 6 as a white solid (477 mg, 51 %). ESI-MS (+): 529.7  $[\text{M}+\text{H}]^+$ , 569.6  $[\text{M}+\text{Na}+\text{H}_2\text{O}]^+$ ; HRMS (ESI):  $m/z$   $[\text{M}+\text{H}]^+$  calcd. for  $\text{C}_{34}\text{H}_{60}\text{N}_2\text{O}_2$ : 529.4728, found 529.4729  $[\text{M}+\text{H}]^+$ ;  $^1\text{H}$  NMR (300 MHz,  $\text{CDCl}_3$ ): 5.29 (s, H, Cholesterol-6- $\underline{\text{CH}}$ ), 4.89 (broad, H,  $\text{O}=\text{C}-\underline{\text{NH}}$ -), 4.40 (m, H, Cholesterol-3- $\underline{\text{CH}}$ ), 3.09 (d, 2H,  $\text{NH}-\underline{\text{CH}_2}$ -,  $J = 6.2$  Hz), 2.62 (t, 2H,  $\text{H}_2\text{N}-\underline{\text{CH}_2}$ -,  $J = 7.9$  Hz), 0.94, 0.81, 0.79, 0.61 (4  $\times$  s, 4  $\times$  3H,  $-\text{CH}_3$ );  $^{13}\text{C}$  NMR (75 MHz,  $\text{CDCl}_3$ ): 156.25 ( $\text{NH}-\underline{\text{C}}\text{OO}$ ), 139.89 (Cholesterol-5- $\underline{\text{C}}$ ), 122.46 (Cholesterol-6- $\underline{\text{CH}}$ ), 74.07 (Cholesterol-3- $\underline{\text{CH}}$ ), 56.72, 56.17, 50.03, 42.33, 42.07, 40.83, 39.78, 39.57, 38.66, 37.05, 36.58, 36.23, 35.86, 33.53, 31.90, 30.06, 28.26, 28.05, 26.65, 26.58, 24.34, 23.90, 22.90, 22.64, 21.09, 19.39, 18.77, 11.91.

#### (1) ESI-MS (+) spectrum of compound 6

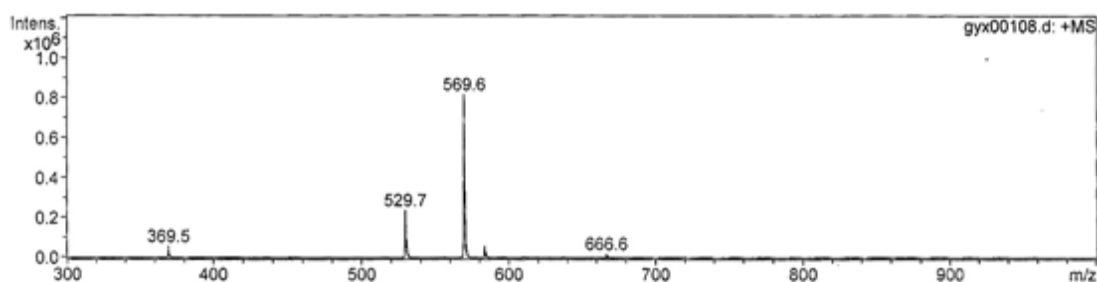

(2) HRMS (ESI) spectrum of compound **6**

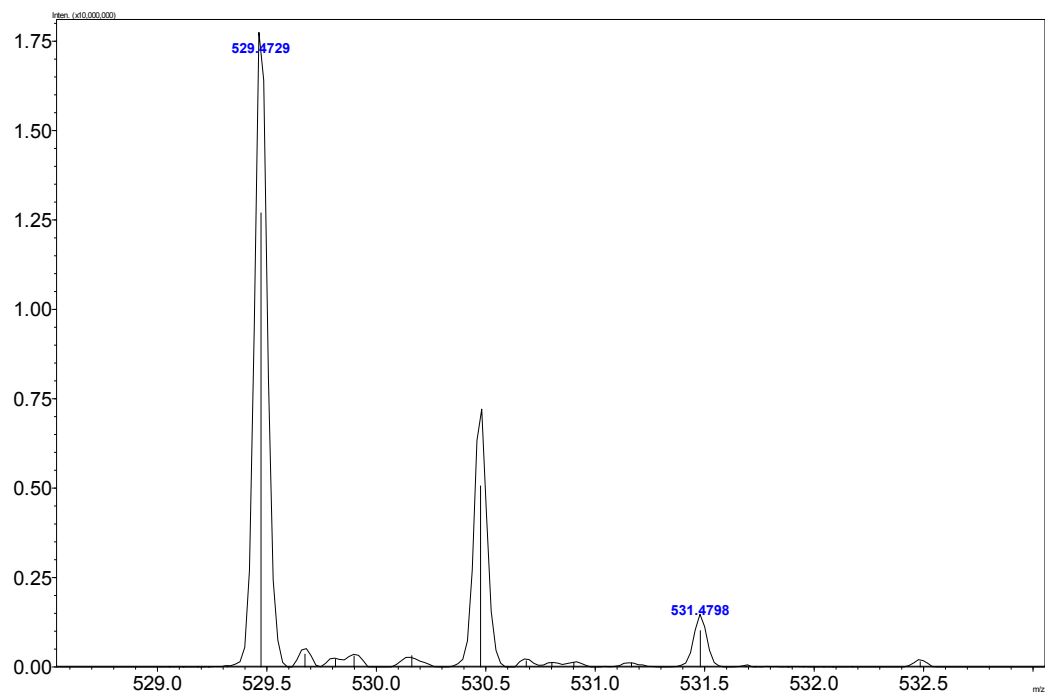

(3)  $^1\text{H}$  NMR spectrum of compound **6** (300 MHz,  $\text{CDCl}_3$ )

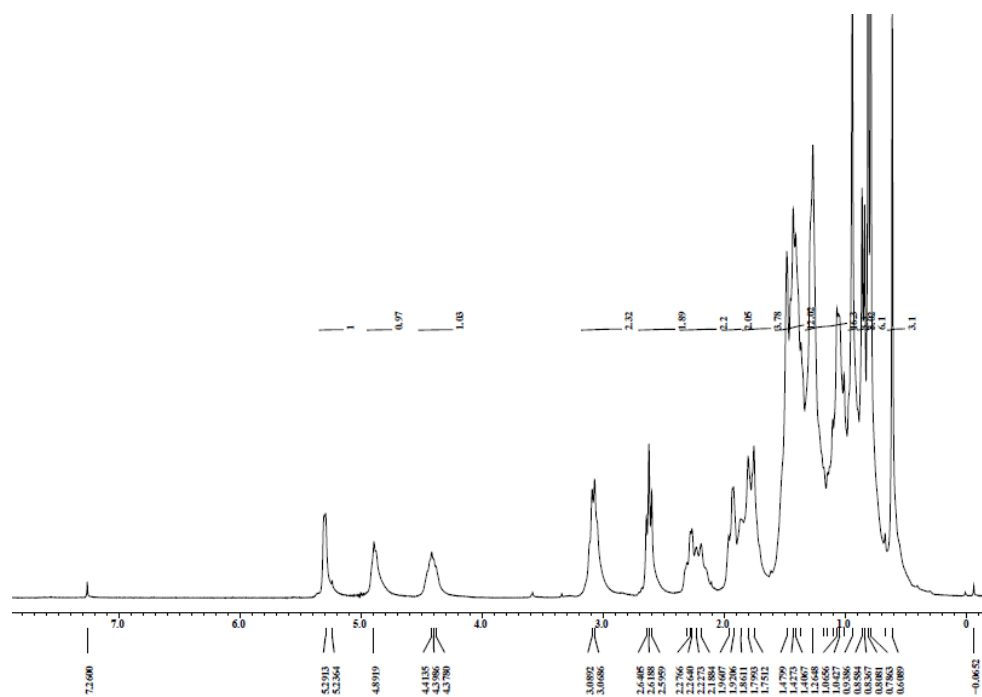

(4)  $^{13}\text{C}$  NMR spectrum of compound **6** (75 MHz,  $\text{CDCl}_3$ )

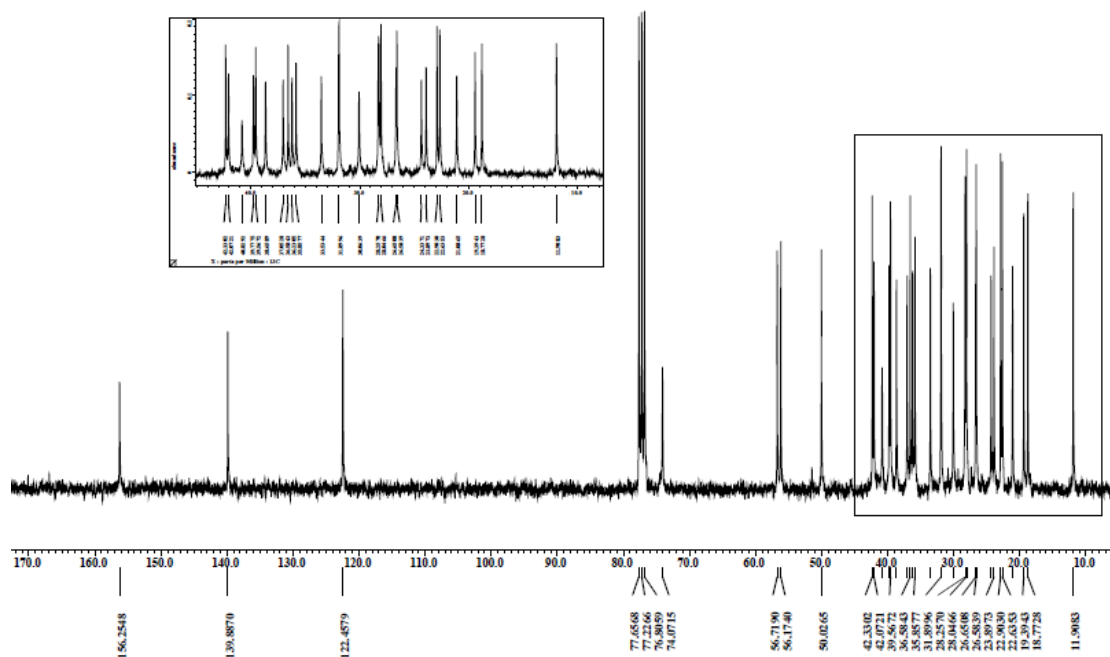

## Compound 5

The coumarin-3-carboxylic acid (171 mg, 0.90 mmol) was first transformed to thionyl chloride, similar synthesis procedure was used as the synthesis of compound 4. Triethylamine (0.2 mL, 1.36 mmol) was added to a solution of **6** (477 mg, 0.90 mmol) in dry CH<sub>2</sub>Cl<sub>2</sub>, then 10 mL CH<sub>2</sub>Cl<sub>2</sub> solution of acyl chloride was added dropwise at 0 °C. After addition, the mixture was stirred at room temperature for 20 h, then washed with water and brine water respectively. The organic phase was dried and filtered, then evaporated to dryness. The control molecule **5** (490 mg, 78%) was obtained as a white solid by chromatography (CH<sub>2</sub>Cl<sub>2</sub> : CH<sub>3</sub>OH=100:1). m.p. 166-168 °C; ESI-MS (+): 724.2 [M+Na]<sup>+</sup>; HRMS (ESI): m/z [M+H]<sup>+</sup> calcd. for C<sub>44</sub>H<sub>64</sub>N<sub>2</sub>O<sub>5</sub>: 701.4888, found 701.4890 [M+H]<sup>+</sup>; <sup>1</sup>H NMR (400 MHz, CDCl<sub>3</sub>): 8.85 (s, H, Coumarin-4-CH), 8.76 (broad, H, NH), 7.63, 7.34 (t, t, 4H, Ar-H), 5.30 (s, H, Cholesterol-6-CH), 4.70 (broad, H, NH), 4.42 (m, H, Cholesterol-3-CH), 3.41 (s, 2H, Coumarin-3-CO-HN-CH<sub>2</sub>), 3.11 (s, 2H, CH<sub>2</sub>-NH-COO), 0.93, 0.86, 0.81, 0.61 (4×s, 4×3H, -CH<sub>3</sub>); <sup>13</sup>C NMR (100 MHz, CDCl<sub>3</sub>): 161.53 (Coumarin-2-C=O), 161.46 (Coumarin-3-CO-NH-), 156.22 (NH-COO), 154.43, 148.27, 134.02, 129.84, 118.72, 118.59 (Ar-C-), 139.91 (Cholesterol-5-C), 125.33 (Cholesterol-6-CH), 122.44 (Coumarin-4-CH), 116.66 (Coumarin-3-C), 74.13 (Cholesterol-3-CH), 56.71, 56.16, 50.03, 42.34, 40.81, 39.78, 39.57, 38.65, 37.05,



36.59, 36.23, 35.85, 31.90, 29.37, 28.30, 28.24, 28.06, 26.68, 26.43, 24.34, 23.90, 22.91, 22.65, 21.08, 19.39, 18.77, 11.92.

(1) ESI-MS (+) spectrum of compound **5**

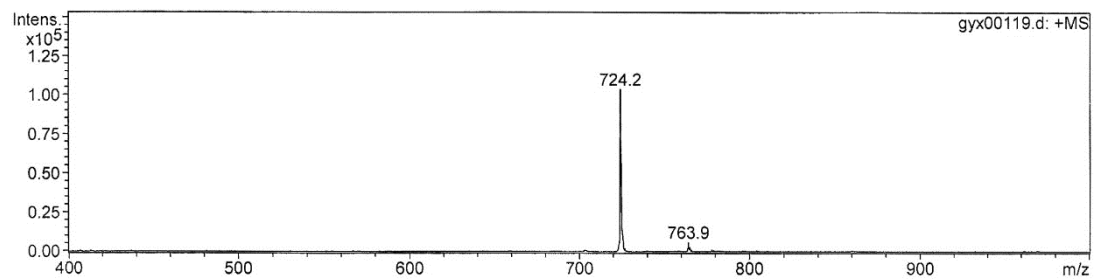

(2) HRMS (ESI) spectrum of compound **5**

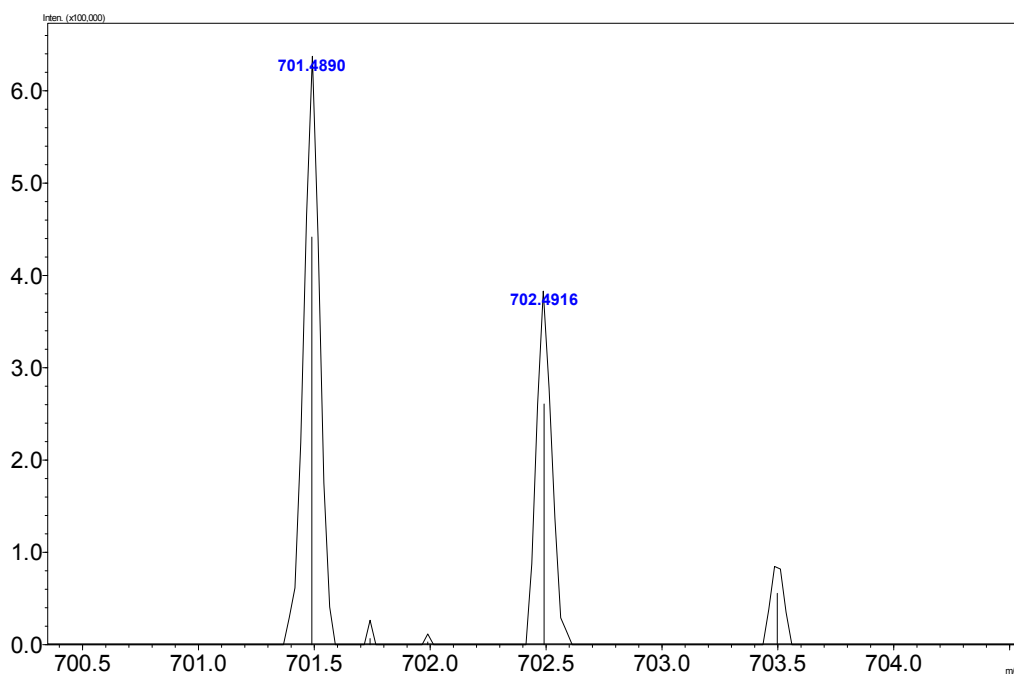

(3) <sup>1</sup>H NMR spectrum of compound **5** (400 MHz, CDCl<sub>3</sub>)

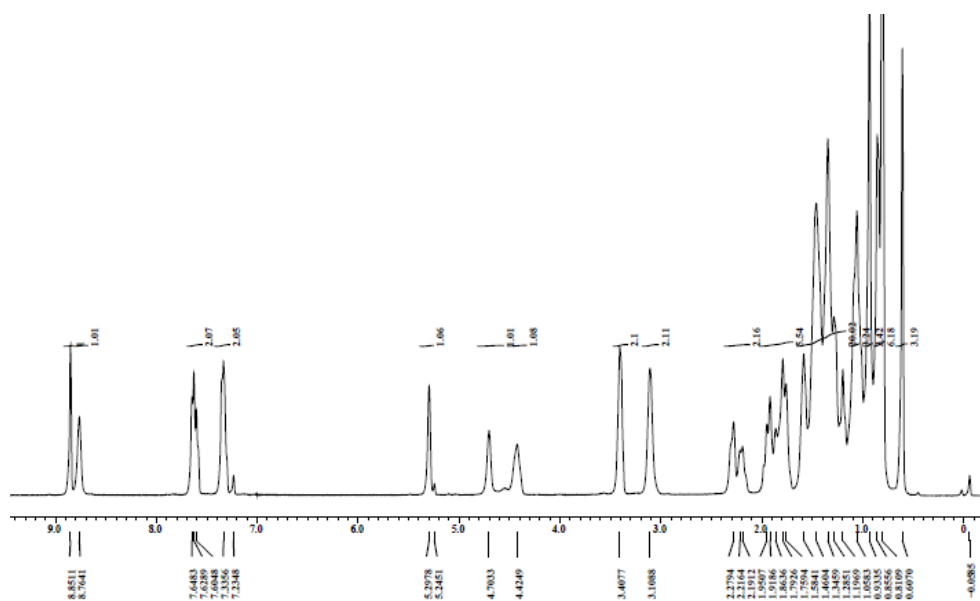

(4)  $^{13}\text{C}$  NMR spectrum of compound **5** (75 MHz,  $\text{CDCl}_3$ )

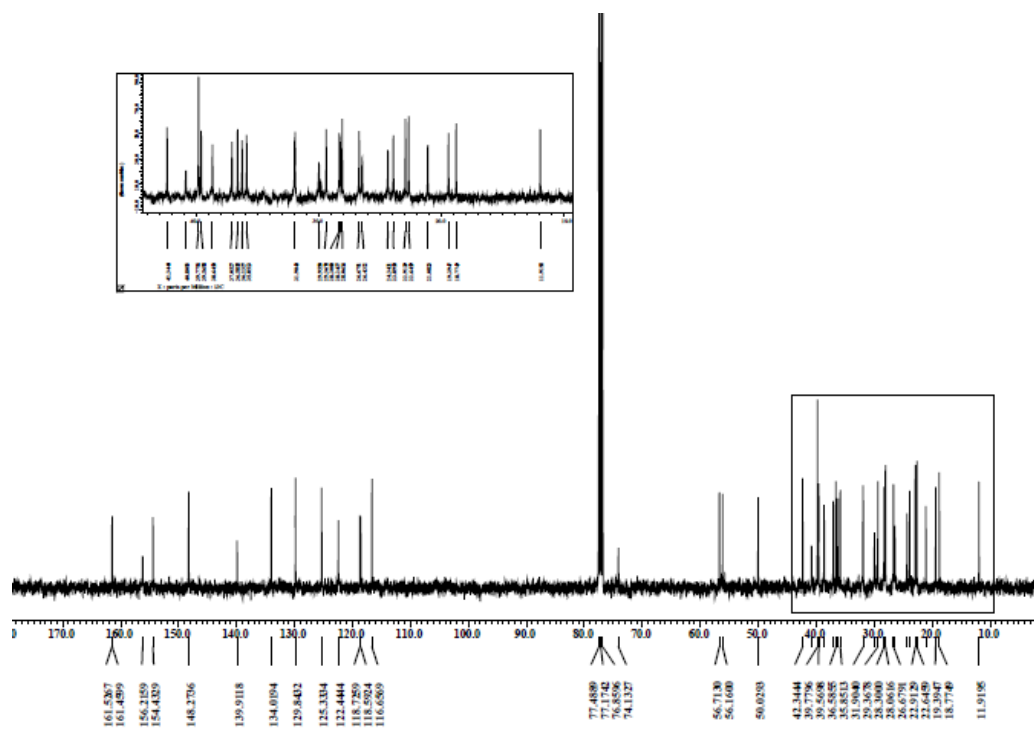

## 6. Reference

1. J. Niu, Z. H. Liu, L. Fu, F. Shi, H. W. Ma, Y. Ozaki and X. Zhang, *Langmuir*, 2008, **24**, 11988.
